# Supplementary material
Source: Springer Nature journal article supplement (https://www.springermedizin.de/resource/supplementary/12885_2008_1167_MOESM13_ESM.pdf/9471296)

|        |   |   |   |   |    |    |   |   |   |   |    |    |
|--------|---|---|---|---|----|----|---|---|---|---|----|----|
| mM NAC | 0 | 0 | 5 | 0 | 25 | 0  | 0 | 0 | 5 | 0 | 25 | 0  |
| mM GSH | 0 | 0 | 0 | 5 | 0  | 25 | 0 | 0 | 0 | 5 | 0  | 25 |
| CS     | - | + | + | + | +  | +  | - | + | + | + | +  | +  |

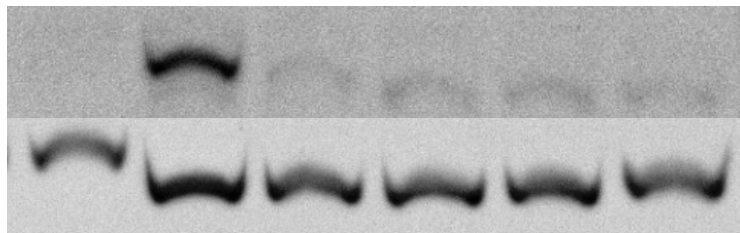

1h post-exposure

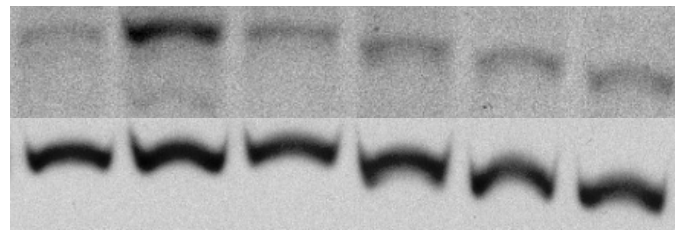

4h post-exposure

p-eIF2α

GAPDH

Supplement: MOESM13 [file 9471296]
